# Supplementary material for: Low expression of RNA sensors impacts Zika virus infection in the lower female reproductive tract
Source: PubMed Central journal article supplement (PMC6761111; doi:10.1038/s41467-019-12371-7), 2019-09-25
Supplement: 41467_2019_12371_MOESM1_ESM.pdf [file 41467_2019_12371_MOESM1_ESM.pdf]

**Supplementary Information**

**Low expression of RNA sensors impacts Zika virus infection in the lower female reproductive tract**

Khan et al.

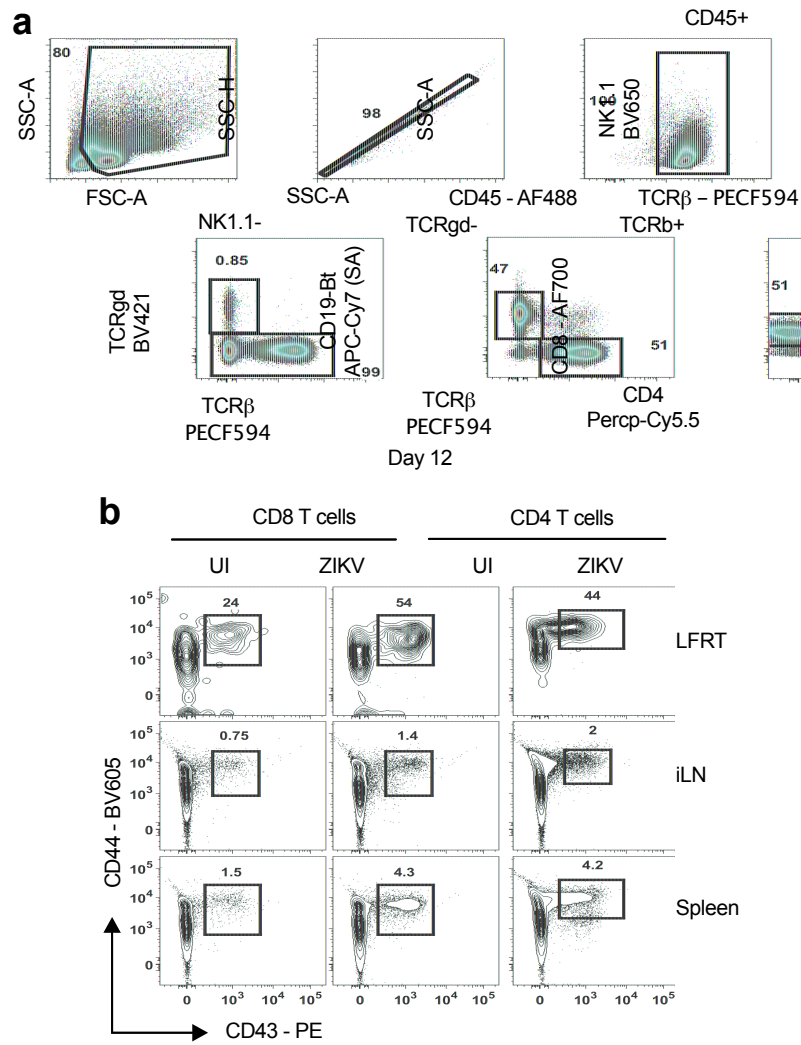

**Supplementary Figure 1: Vaginal ZIKV infection enhances the number and activation of T cells.**

Related to Figure 1. Groups of DMPA-treated female mice were i.vag. inoculated with  $2 \times 10^4$  FFU of ZIKV (PRVABC59). (a) Gating strategy for identifying different immune cell populations. (b) Representative ratio of activated T cells in indicated tissues in UI and ZIKV infected mice at day 12 p.i..

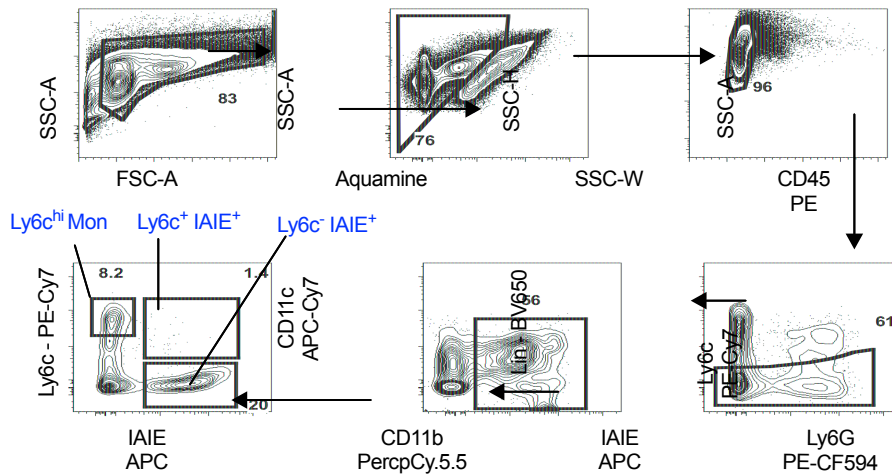

**Supplementary Figure 2: Gating strategy to identify CD11b<sup>+</sup> monocyte populations.**

Related to Figure 2. Groups of DMPA-treated female mice were i.vag. inoculated with  $2 \times 10^4$  FFU of ZIKV (PRVABC59). Representative flow plots for identifying monocyte subsets. Total cells were gated on SSC-A and FSC-A. Dead cells were excluded based on Aquamine Live/dead staining. Single cells were gated on SSC-H and SSC-W. Hematopoietic cells were identified based on CD45 staining. After excluding Ly6c<sup>+</sup>Ly6G<sup>+</sup> neutrophils and Lin<sup>+</sup> (TCRβ<sup>+</sup> NK1.1<sup>+</sup> CD19<sup>+</sup> EpCAM-1<sup>+</sup>) cells, CD11b<sup>+</sup> cells were divided into three different monocyte populations: 1) Ly6c<sup>hi</sup> monocytes, 2) Ly6c<sup>+</sup> IAIE<sup>+</sup> cells, and 3) Ly6c<sup>-</sup> IAIE<sup>+</sup> cells. LFRT, lower female reproductive tract.

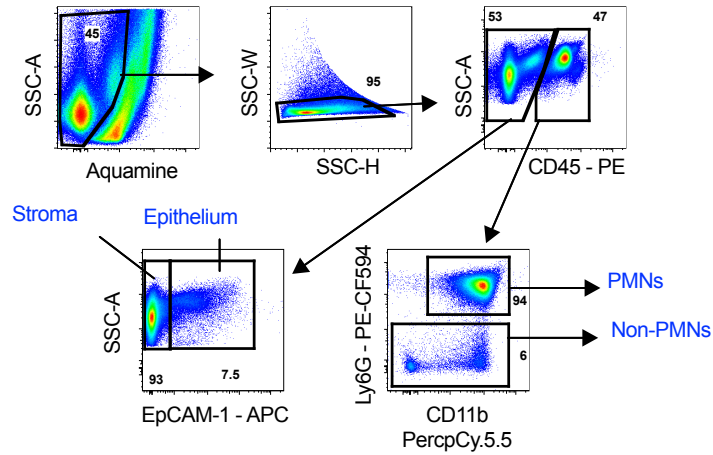

**Supplementary Figure 3: Gating strategy for LFRT cell sorting.**

Related to Figure 6. Live hematopoietic and non-hematopoietic cells from LFRT were sorted by first excluding doublets based on SSC-W and SSC-H gating. The CD45<sup>-</sup> cells were further divided into EpCAM-1<sup>+</sup> epithelial and EpCAM-1<sup>-</sup> stromal cells. The CD45<sup>+</sup> cells were then gated on CD11b<sup>+</sup> Ly6G<sup>+</sup> polymorphonuclear neutrophils (PMNs) or other Ly6G<sup>-</sup> hematopoietic cells.

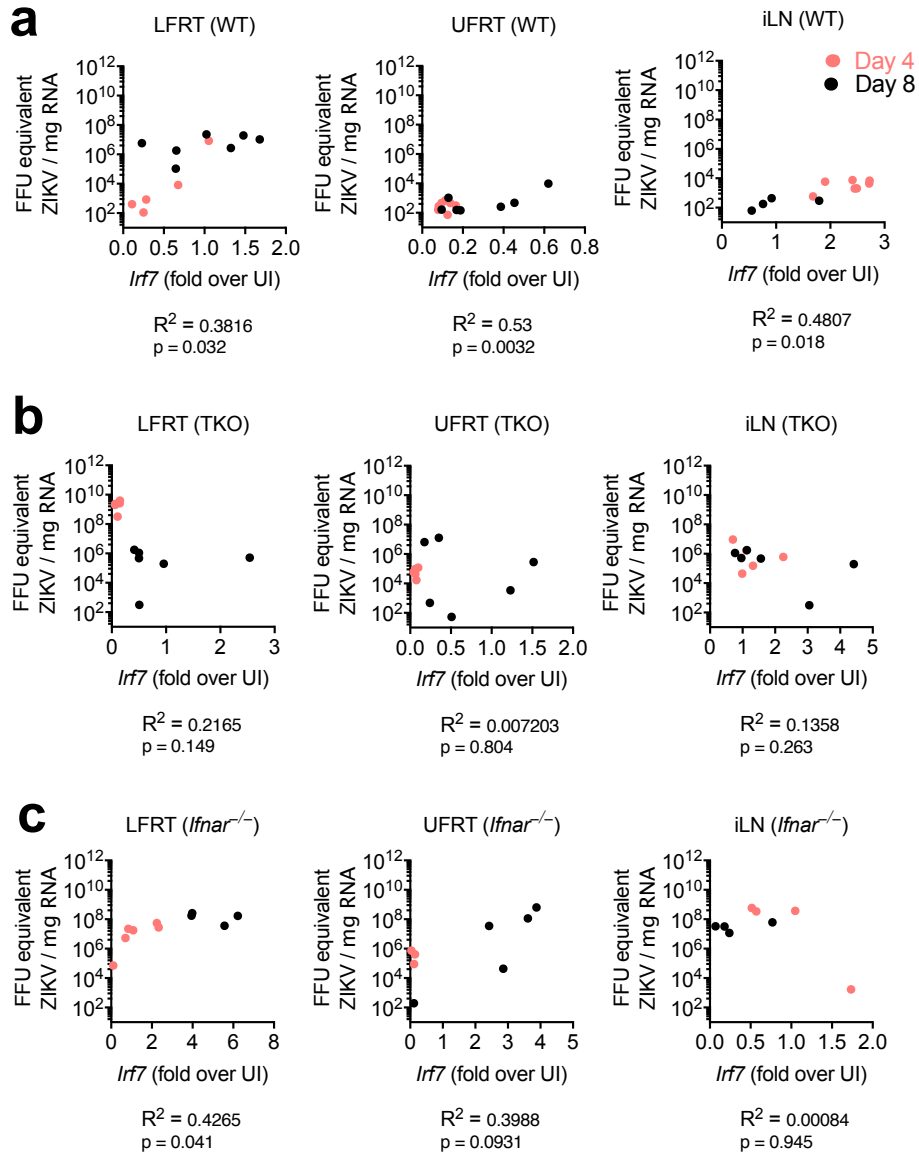

**Supplementary Figure 4: Linear regression analysis of ZIKV copy numbers and *Irf7* induction.**

Related to Figure 7. Groups of DMPA-treated (a) WT, (b) TKO, or (c) *Ifnar1*<sup>-/-</sup> female mice were i.vag.

inoculated with  $2 \times 10^4$  FFU of ZIKV (PRVABC59). At days 4 and 8 post i.vag. infection, ZIKV RNA copies and *Irf7* fold induction were measured in indicated tissues (as also shown in Fig. 6) and the data were re-plotted here for linear regression analysis. Source data for (a-c) are provided as a Source Data file.

**Supplementary Table 1:** Primer sequences for qRT-PCR analyses.

| <b>Gene</b>               | <b>Forward (SYBR)</b>     | <b>Reverse (SYBR)</b>   | <b>Accession no.</b> |
|---------------------------|---------------------------|-------------------------|----------------------|
| ZIKV                      | GAGACGAGATGCGGTACAGG      | CGACCGTCAGTTGAACTCCA    |                      |
| <i>Gapdh</i><br>(Macaque) | GGAGTCAACGGATTTGGTTCG     | ATGACGAGCTTCCCGTTCTC    | NM_001195426.<br>1   |
| <i>Tlr3</i><br>(Macaque)  | CCTGGTTTGTTAATTGGATTAACGA | TGAGGTGGAGTGTTGCAAAGG   | XM_015139554.<br>1   |
| <i>Tlr7</i><br>(Macaque)  | TTGGCACCTCTCATGCTCTG      | GTGTCCACACTGGAAACATCATT | NM_001130426.<br>2   |
| <i>Ddx58</i><br>(Macaque) | GCTGATGAAGGCATTGACATTGC   | CAGAAGGAAGCACTTGCTACCTC | NM_001042668.<br>1   |
| <i>Ifih1</i><br>(Macaque) | CTGACTTGCCCTCTCCATCG      | GCAGCAATCCGGTTTCTGTCT   | NM_001047123.<br>2   |
| <i>Mex3b</i><br>(Macaque) | TAAAATCAAAGCGCTGCGGG      | TGTTCTTATTCCGGGAGGCG    | XM_001110186.<br>3   |
| <i>Irf7</i><br>(Macaque)  | GGAGAGGGACAAGAGGGTCT      | TGGCCTCGCTGTCATTAG      | NM_001136100.<br>1   |
| <i>Gapdh</i><br>(Mouse)   | TGTGTCCGTCGTGGATCTGA      | CCTGCTTACCACCTTCTTGA    | NM_008084.3          |
| <i>Tlr3</i><br>(Mouse)    | CTCTGAACAACGCCAACT        | GTCCACTCAGCCCAGAGAA     | NM_126166.5          |
| <i>Tlr7</i><br>(Mouse)    | ATGTGGACACGGAAGAGACAA     | GGTAAGGGTAAGATTGGTGGTG  | NM_133211.4          |
| <i>Ddx58</i><br>(Mouse)   | TTGCTGAGTGCAATCTCGTC      | GTATGCGGTGAACCGTCTTT    | NM_172689.3          |
| <i>Ifih1</i><br>(Mouse)   | GGCACCATGGGAAGTGATT       | ATTTGGTAAGGCCTGAGCTG    | NM_027835.3          |
| <i>Mex3b</i><br>(Mouse)   | ACCCAGTTCGAACACGTCG       | TGTTCTTGTTACGAGAGGCT    | NM_175366.3          |
| <i>Irf7</i><br>(Mouse)    | CAGCAGCAGTCTCGGCTTGTG     | TGACCCAGGTCCATGAGGAAGTG | NM_016850.3          |
